**Title:**

Early SARS-CoV-2 reinfections within 60 days highlight the need to consider antigenic variations together with duration of immunity in defining retesting policies

**Authors:**

Louis Nevejan<sup>1</sup>, Lize Cuypers<sup>1</sup>, Lies Laenen<sup>1</sup>, Liselotte Van Loo<sup>2</sup>, François Vermeulen<sup>2</sup>, Elke Wollants<sup>3</sup>, Ignace Van Hecke<sup>1</sup>, Stefanie Desmet<sup>1,4</sup>, Katrien Lagrou<sup>1,4</sup>, Piet Maes<sup>3</sup>, Emmanuel André<sup>1,4</sup>

**Affiliations:**

<sup>1</sup> Department of Laboratory Medicine, National Reference Center for Respiratory Pathogens, UZ Leuven – University Hospitals Leuven, Leuven, Belgium

<sup>2</sup> Department of Pediatrics, UZ Leuven – University Hospitals Leuven, Leuven, Belgium

<sup>3</sup> KU Leuven, Rega Institute, Department of Microbiology, Immunology and Transplantation, Laboratory of Clinical and Epidemiological Virology, Leuven, Belgium

<sup>4</sup> KU Leuven Department of Microbiology, Immunology and Transplantation, Laboratory of Clinical Microbiology, Leuven, Belgium

**Corresponding author:**

Louis Nevejan

Department of Laboratory Medicine, National Reference Center for Respiratory Pathogens

UZ Leuven – University Hospitals Leuven

Herestraat 49

3000 Leuven – BELGIUM

[louis.nevejan@uzleuven.be](mailto:louis.nevejan@uzleuven.be)

**Conflicts of interest:** LN, LC, LL, LVL, FV, EW, IVH, SD, KL, PM, EA: none to declare

**Funding source:** none to declare

**Acknowledgment:** UZ Leuven, as national reference center for respiratory pathogens, is supported by Sciensano, which is gratefully acknowledged

1 **Abstract:**

2 The emergence of the SARS-CoV-2 Omicron variant, characterized by a significant antigenic diversity  
3 compared to the previous Delta variant, had led to a decrease in antibody efficacy in both  
4 convalescent and vaccinees' sera resulting in high number of reinfections and breakthrough cases  
5 worldwide. However, to date, reinfections are defined by the ECDC as two positive tests  $\geq 60$  days  
6 apart, influencing retesting policies after an initial positive test in several European countries. We  
7 illustrate by a clinical case supplemental by epidemiological data that early reinfections do occur  
8 within 60 days especially in young, unvaccinated individuals. In older patient groups, unvaccinated  
9 and patients with a basic vaccination scheme are more vulnerable to reinfections compared to  
10 patients who received a first booster vaccine. For this reason, we consider that the duration of  
11 protection offered by a previous infection should be reconsidered, in particular when a shift between  
12 consecutive SARS-CoV-2 variants occurs.

13 **Text:**

14 The sequential emergence of SARS-CoV-2 variants of concern (VOCs), characterized by both an  
15 antigenic drift and higher transmissibility, has been observed in all countries around the world at  
16 least three times during the last 13 months (1). These abrupt viral population replacements  
17 inevitably impact the residual population immunity, independently from the timing of a previous  
18 infection. While the SARS-CoV-2 Delta variant showed a limited antigenic diversity with previous  
19 VOCs, Omicron differs more significantly from other VOCs than any previous variant did at the time  
20 they emerged (2). The resulting decrease of antibody efficacy in both convalescent and vaccinees'  
21 sera drives the high number of reinfection and breakthrough cases observed with Omicron compared  
22 to the observations made during the previous waves (3–6).

23 To date, reinfections with SARS-CoV-2 are defined by the European Centre for Disease Prevention  
24 and Control (ECDC) as two positive tests  $\geq 60$  days apart (technical report April 8, 2021) (7). This  
25 definition has influenced testing strategies in several countries, and many countries therefore do not  
26 recommend retesting patients for six months after a positive test. We consider that this definition  
27 needs to be revised.

28 To illustrate our point, we report here a case of an immunocompetent boy with no significant  
29 medical history, who was infected with SARS-CoV-2 Delta variant ( $\geq 7.0$  log copies/mL, sublineage  
30 AY.43) in early December, 2021, concomitant with an outbreak at the patient's school (Table 1). The  
31 patient's sibling and one parent were infected as well ( $\geq 7.0$  log copies/mL respectively  $\geq 5.0$  -  $< 7.0$  log  
32 copies/mL). All three developed mild COVID-19 symptoms. The other parent, boosted 1 month  
33 before, tested negative twice. Due to an unrelated trauma two weeks later, the patient was admitted

34 to the hospital for surgery. Systematic SARS-CoV-2 screening performed at admission detected a low  
35 viral load (<3.0 log copies/mL), interpreted as viral remnant of the past infection 16 days earlier and  
36 typing of this sample was not possible due to low viral load. Three weeks later, the patient was  
37 readmitted for a second stage surgery. Preprocedural SARS-CoV-2 screening detected a strong  
38 positive result (5.1 log copies/mL) with Omicron BA.1 variant, therefore only 39 days after the  
39 patient's infection with Delta. The patient remained pauci-symptomatic. High-risk contact screening  
40 of the patient's brother detected a low viral load (<3.0 log copies/mL, untypable due to the low viral  
41 load), the mother tested SARS-CoV-2 negative and the father was not retested.

42 Further, to put this clinical case into a wider epidemiological context, we estimated the incidence of  
43 early reinfections with 1) Omicron BA.1 after Delta infection and 2) with Omicron BA.2 after BA.1  
44 infections in a community setting (Flemish Brabant, Belgium).

45 Between December 1, 2021 and February 7, 2022 (n = 9 weeks), a period characterized by the viral  
46 replacement of Delta by Omicron BA.1, a total of 56,831 ambulatory patients tested SARS-CoV-2  
47 positive at the federal testing platform located in Leuven, Belgium. Among these, 0.16% (91 out of  
48 56,831) had the S-gene detected in a first sample using the TaqPath PCR test (suggestive of Delta  
49 infection), while S-gene target failure (SGTF) was reported in a second positive sample within this  
50 time period (cycle threshold N gene <27.8), assuming a reinfection with Omicron BA.1 briefly after  
51 Delta infection.

52 Similarly, between January 1, 2022 and March 10, 2022 (n = 9 weeks), a period characterized by viral  
53 replacement of Omicron BA.1 by BA.2, a total of 48,829 patients tested SARS-CoV-2 positive. Among  
54 these, 0.01% (5 out of 48,829) presented an SGTF in a first sample but had an S-gene detected in a  
55 second positive sample. Considering the epidemiological context during the latter period in this  
56 region, reinfections with Omicron BA.2 after BA.1 infection were suspected in these patients.

57 In Figure 1, we report the age and vaccination status of these 96 patients with documented early  
58 reinfection, compared to the vaccination rate for the same age groups in the same geographic region  
59 (Flanders, Belgium) (8). Early reinfections were most frequently observed among young unvaccinated  
60 patients (<12 years old). In all age groups, patients with early reinfection had a lower vaccination rate  
61 compared to the corresponding age groups in the general population. Boosted patients had the  
62 lowest risk of early SARS-CoV-2 reinfection. Median time between the last vaccine dose and  
63 reinfection in all patients was 172 days (IQR 76-195 days). Median time between the two positive  
64 samples with different VOC was 47 days (range 17-65 days).

65 Previous large retrospective cohort studies showing a prolonged maintenance of protection against  
66 reinfection should be questioned in the context of Omicron (3). Our data confirms that early Omicron

67 BA.1 reinfection (<60 days) after Delta infection and BA.2 reinfection after a BA.1 infection can occur,  
68 especially in young, unvaccinated individuals. In older patient groups, unvaccinated and patients with  
69 a basic vaccination scheme are more vulnerable to reinfections compared to patients who received a  
70 first booster vaccine. Data from Denmark (9) suggests reinfection usually results in mild disease not  
71 requiring hospitalization as is illustrated by this reported case.

72 For this reason, we consider that the duration of protection offered by a previous infection should be  
73 reconsidered, in particular when a shift between consecutive SARS-CoV-2 variants occurs. Testing  
74 policies should not assume that patients do not need to be retested within a period of 60 days, as  
75 reinfections, especially in unvaccinated young patients, are not inconceivable within this timeframe.  
76 It has been repeatedly observed that a full viral population replacement can occur in a matter of a  
77 few weeks, and such phenomenon will continue to impact the duration and efficacy of immunity in  
78 the future.

1 **Table 1. Results of SARS-CoV-2 screening and vaccination status in the patient and his family.** All samples were analyzed  
 2 using reverse transcription polymerase chain reaction, whole genome sequencing was performed on SARS-CoV-2 positive  
 3 samples in the Belgian National Reference Center for Respiratory Pathogens (10).

|                         |               | PATIENT                                                                   | SIBLING                                                                   | PARENT                                                                    | PARENT                                                 |
|-------------------------|---------------|---------------------------------------------------------------------------|---------------------------------------------------------------------------|---------------------------------------------------------------------------|--------------------------------------------------------|
|                         |               | Non-vaccinated                                                            | 08/2021 BNT162b2<br>09/2021 BNT162b2                                      | 06/2021 BNT162b2<br>07/2021 BNT162b2                                      | 02/2021 ChAdOx1<br>05/2021 ChAdOx1<br>11/2021 BNT162b2 |
| <b>FIRST INFECTION</b>  | DECEMBER 2021 |                                                                           |                                                                           |                                                                           |                                                        |
|                         | early         | SARS-CoV-2<br>very strong positive<br>≥7.0 log copies/mL<br>Delta (AY.43) | SARS-CoV-2<br>very strong positive<br>≥7.0 log copies/mL<br>Delta (AY.43) | SARS-CoV-2<br>strong positive<br>≥5 - <7.0 log copies/mL<br>Delta (AY.43) | SARS-CoV-2<br>negative                                 |
|                         | early         |                                                                           |                                                                           |                                                                           | SARS-CoV-2<br>negative                                 |
|                         | mid           | SARS-CoV-2<br>weak positive<br><3.0 log copies/mL<br>untypable            |                                                                           |                                                                           |                                                        |
| <b>SECOND INFECTION</b> | JANUARY 2022  |                                                                           |                                                                           |                                                                           |                                                        |
|                         | early         | SARS-CoV-2<br>strong positive<br>5.05 log copies/mL<br>Omicron (BA.1)     |                                                                           |                                                                           |                                                        |
|                         | mid           | SARS-CoV-2<br>negative                                                    | SARS-CoV-2<br>weak positive<br><3.0 log copies/mL<br>untypable            | SARS-CoV-2<br>negative                                                    |                                                        |
|                         | mid           | SARS-CoV-2<br>negative                                                    |                                                                           |                                                                           |                                                        |

4

Figure 1. Number of patients with documented SARS-CoV-2 reinfection including vaccination status compared with age corresponding vaccination coverage in the community (i.e. Flanders, Belgium)

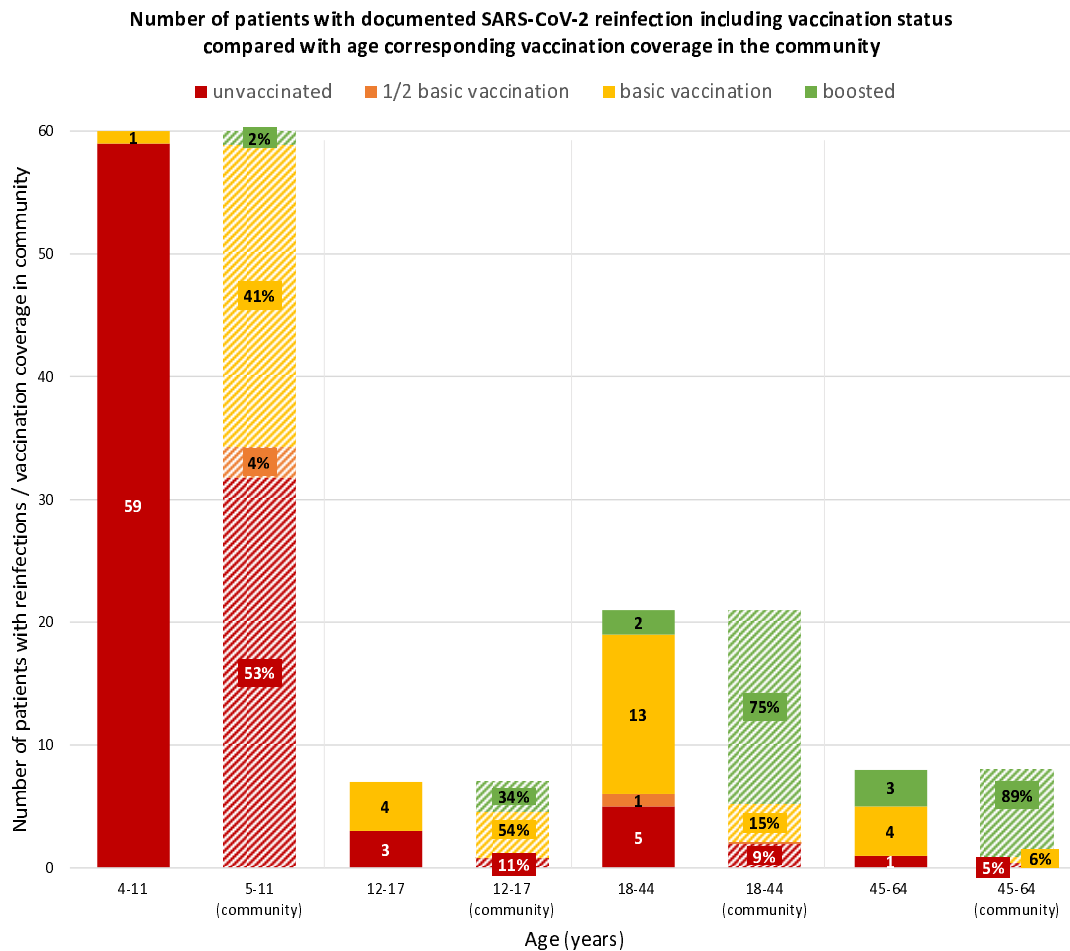

## References

1. Mullen JL, Tsueng G, Abdel Latif A, Alkuzweny M, Cano M, Haag E, et al. Outbreak.info [Internet]. 2020 [cited 2022 Feb 4]. Available from: [outbreak.info](https://outbreak.info)
2. Van der Straten K, Guerra D, Van Gils MJ, Bontjer I, Caniels TG, Van Willigen HDG, et al. Mapping the antigenic diversification of SARS-CoV-2. medRxiv [Internet]. 2022; Available from: <https://www.medrxiv.org/content/10.1101/2022.01.03.21268582v1%0Ahttps://www.medrxiv.org/content/10.1101/2022.01.03.21268582v1.abstract>
3. Kim P, Gordon SM, Sheehan MM, Rothberg MB. Duration of Severe Acute Respiratory Syndrome Coronavirus 2 Natural Immunity and Protection Against the Delta Variant: A Retrospective Cohort Study. Clin Infect Dis [Internet]. 2021 Dec 3;(Xx Xx):1–6. Available from: <https://academic.oup.com/cid/advance-article/doi/10.1093/cid/ciab999/6448857>
4. Planas D, Saunders N, Maes P, Guivel-Benhassine F, Planchais C, Buchrieser J, et al. Considerable escape of SARS-CoV-2 Omicron to antibody neutralization. Nature [Internet]. 2022 Feb 24;602(7898):671–5. Available from: <https://www.nature.com/articles/s41586-021-04389-z>
5. Pulliam JRC, Schalkwyk C van, Govender N, Gottberg A von, Cohen C, Groome MJ, et al. Increased risk of SARS-CoV-2 reinfection associated with emergence of the Omicron variant in South Africa. medRxiv [Internet]. 2021; Available from: <https://www.medrxiv.org/content/10.1101/2021.11.11.21266068v2%0Ahttps://www.medrxiv.org/content/10.1101/2021.11.11.21266068v2.abstract>
6. Rahman S, Rahman MM, Miah M, Begum MN, Sarmin M, Mahfuz M, et al. COVID-19 reinfections among naturally infected and vaccinated individuals. Sci Rep [Internet]. 2022 Dec 26;12(1):1438. Available from: <https://www.nature.com/articles/s41598-022-05325-5>
7. European Centre for Disease Prevention and Control. Reinfection with SARS-CoV-2: implementation of a surveillance case definition within the EU/EEA [Internet]. Stockholm; 2021. Available from: <https://www.ecdc.europa.eu/en/publications-data/reinfection-sars-cov-2-implementation-surveillance-case-definition-within-eueea>
8. Vaesen J. Covid Vaccinatie België [Internet]. 2022 [cited 2022 Mar 21]. Available from: <https://covid-vaccinatie.be/nl>
9. Stegger M, Edslev SM, Sieber RN, Ingham AnC, Ng KL, Tang M-HE, et al. Occurrence and

significance of Omicron BA . 1 infection followed by Corresponding author. medRxiv  
[Internet]. 2022; Available from: <https://doi.org/10.1101/2022.02.19.22271112>

10. Pirnay J-P, Selhorst P, Hong SL, Cochez C, Potter B, Maes P, et al. Variant Analysis of SARS-CoV-2 Genomes from Belgian Military Personnel Engaged in Overseas Missions and Operations. *Viruses* [Internet]. 2021 Jul 13;13(7):1359. Available from: <https://www.mdpi.com/1999-4915/13/7/1359>
